# Supplementary material for: Rational design of balanced dual-targeting antibiotics with limited resistance
Source: PLoS Biol. 2020 Oct 5;18(10):e3000819. doi: 10.1371/journal.pbio.3000819 (PMC7561186; doi:10.1371/journal.pbio.3000819)
Supplement: S1 Data — MIC, minimum inhibitory concentration. (XLSX) [file pbio.3000819.s019.xlsx]

## Sheet: Used_oligos
Oligo name	Oligo sequence	Description
769B2F	ACACACAGACTGTGAGAGCGATGGTGACTGCATTG	gyrB drug-target region sequencing primer for S. aureus ATCC 700699 VISA strains, forward
769E2F	ACACACAGACTGTGAGGCAGGAGGCGAAATCATTG	parE drug-target region sequencing primer for S. aureus ATCC 700699 VISA strains, forward
SAPE1R	ACCATTTGCTTCACCTGAAAATGTAGC	parE drug-target region sequencing primer for S. aureus ATCC 700699 VISA strains, reverse
B7699F51	CGTGTCTAGCGCGCGCAGCGATGGTGACTGCATTG	gyrB drug-target region sequencing primer for S. aureus ATCC 700699 VISA strain with PacBio Sequel barcode, forward, library nr. 8
B7699F52	GTGTGAGATATATATCAGCGATGGTGACTGCATTG	gyrB drug-target region sequencing primer for S. aureus ATCC 700699 VISA strain with PacBio Sequel barcode, forward, library nr. 9
B7699F53	CTCACGTACGTCACACAGCGATGGTGACTGCATTG	gyrB drug-target region sequencing primer for S. aureus ATCC 700699 VISA strain with PacBio Sequel barcode, forward, library nr. 10
B7699F54	GCGCACGCACTACAGAAGCGATGGTGACTGCATTG	gyrB drug-target region sequencing primer for S. aureus ATCC 700699 VISA strain with PacBio Sequel barcode, forward, library nr. 11
B7699F55	CACACGAGATCTCATCAGCGATGGTGACTGCATTG	gyrB drug-target region sequencing primer for S. aureus ATCC 700699 VISA strain with PacBio Sequel barcode, forward, library nr. 12
B7699R51	GCGCGCGCTAGACACGCGGCATCAGTCATAATGACG	gyrB drug-target region sequencing primer for S. aureus ATCC 700699 VISA strain with PacBio Sequel barcode, reverse, library nr. 8
B7699R52	GATATATATCTCACACCGGCATCAGTCATAATGACG	gyrB drug-target region sequencing primer for S. aureus ATCC 700699 VISA strain with PacBio Sequel barcode, reverse, library nr. 9
B7699R53	GTGTGACGTACGTGAGCGGCATCAGTCATAATGACG	gyrB drug-target region sequencing primer for S. aureus ATCC 700699 VISA strain with PacBio Sequel barcode, reverse, library nr. 10
B7699R54	TCTGTAGTGCGTGCGCCGGCATCAGTCATAATGACG	gyrB drug-target region sequencing primer for S. aureus ATCC 700699 VISA strain with PacBio Sequel barcode, reverse, library nr. 11
B7699R55	GATGAGATCTCGTGTGCGGCATCAGTCATAATGACG	gyrB drug-target region sequencing primer for S. aureus ATCC 700699 VISA strain with PacBio Sequel barcode, reverse, library nr. 12
E7699F51	CGTGTCTAGCGCGCGCGCAGGAGGCGAAATCATTG	parE drug-target region sequencing primer for S. aureus ATCC 700699 VISA strain with PacBio Sequel barcode, forward, library nr. 8
E7699F52	GTGTGAGATATATATCGCAGGAGGCGAAATCATTG	parE drug-target region sequencing primer for S. aureus ATCC 700699 VISA strain with PacBio Sequel barcode, forward, library nr. 9
E7699F53	CTCACGTACGTCACACGCAGGAGGCGAAATCATTG	parE drug-target region sequencing primer for S. aureus ATCC 700699 VISA strain with PacBio Sequel barcode, forward, library nr. 10
E7699F54	GCGCACGCACTACAGAGCAGGAGGCGAAATCATTG	parE drug-target region sequencing primer for S. aureus ATCC 700699 VISA strain with PacBio Sequel barcode, forward, library nr. 11
E7699F55	CACACGAGATCTCATCGCAGGAGGCGAAATCATTG	parE drug-target region sequencing primer for S. aureus ATCC 700699 VISA strain with PacBio Sequel barcode, forward, library nr. 12
E7699R51	GCGCGCGCTAGACACGTGCGCACCATCAGTATCAG	parE drug-target region sequencing primer for S. aureus ATCC 700699 VISA strain with PacBio Sequel barcode, reverse, library nr. 8
E7699R52	GATATATATCTCACACTGCGCACCATCAGTATCAG	parE drug-target region sequencing primer for S. aureus ATCC 700699 VISA strain with PacBio Sequel barcode, reverse, library nr. 9
E7699R53	GTGTGACGTACGTGAGTGCGCACCATCAGTATCAG	parE drug-target region sequencing primer for S. aureus ATCC 700699 VISA strain with PacBio Sequel barcode, reverse, library nr. 10
E7699R54	TCTGTAGTGCGTGCGCTGCGCACCATCAGTATCAG	parE drug-target region sequencing primer for S. aureus ATCC 700699 VISA strain with PacBio Sequel barcode, reverse, library nr. 11
E7699R55	GATGAGATCTCGTGTGTGCGCACCATCAGTATCAG	parE drug-target region sequencing primer for S. aureus ATCC 700699 VISA strain with PacBio Sequel barcode, reverse, library nr. 12

## Sheet: MIC_Strains_data
Hungarian Academy of Sciences		3511
					MIC (µg/ml)								Strain informations
Test date	IHMA No	NRS No	Organism	Resistance Phenotype	ULD1	ULD2	Levofloxacin	Oxacillin	Vancomycin	Moxifloxacin	Linezolid	Azithromycin	Pulse-field type	Site of isolation	Genetic background	Details
2018-10-25	ATCC 29213	-	S. aureus	MSSA / VSSA	0.5	0.25	0.25	0.25	1	0.06	2	1
2018-10-25	ATCC 29213	-	S. aureus	MSSA / VSSA	1	0.5	0.25	0.25	1	0.03	2	1
2018-10-25	ATCC 29213	-	S. aureus	MSSA / VSSA	0.5	0.25	0.25	0.25	1	0.06	4	1
2018-11-07	ATCC 29213	-	S. aureus	MSSA / VSSA	0.25	0.25	0.25	0.25	1	0.03	2	1
2018-10-25	1308243	NRS3	S. aureus	MRSA / VISA	1	0.5	32	>64	8	8	1	>32		Michigan, USA, 1997	Positive: mec (subtype II); Negative: vanA, vanB, vanC1, vanC2, vanD, and vanE	S. aureus, strain HIP5827 is a vancomycin-intermediate S. aureus (VISA) strain. S. aureus, strain HIP5827 was deposited as positive for mec (subtype II); negative for vanA, vanB, vanC1, vanC2, vanD, and vanE; MLST sequencing type (ST) 5; eGenomic spa type 12, eGenomic spa repeats TJMGMK; Ridom spa type t062.
2018-10-25	649380	NRS4	S. aureus	MRSA / VISA	0.5	0.25	16	>64	4	4	1	>32		New Jersey, USA, 1997	Positive: mec (subtype II); Negative: vanA, vanB, vanC1, vanC2, vanD, and vanE	S. aureus, strain HIP5836 is a vancomycin-intermediate S. aureus (VISA) strain. S. aureus, strain HIP5836 was deposited as positive for mec (subtype II); negative for vanA, vanB, vanC1, vanC2, vanD and vanE; MLST sequencing type (ST) 5; eGenomic spa type 230, eGenomic spa repeats TMBMDMGMK; Ridom spatype t010.
2018-10-25	1308245	NRS13	S. aureus	MSSA / VISA	1	0.5	0.5	0.5	4	0.12	2	1		France, 1998	Negative: mec, vanA, vanB, vanC1, vanC2, vanD and vanE, Resistant to benzylpenicillin	S. aureus, strain SA MER-S12 is a heterogeneous vancomycin-intermediate S. aureus (hVISA) strain, but unlike most hVISA strains, it is susceptible to methicillin. S. aureus, strain SA MER-S12 was deposited as resistant to benzylpenicillin; negative for mec, vanA, vanB, vanC1, vanC2, vanD and vanE; MLST sequencing type (ST) 5; eGenomic spa type 2, eGenomic spa repeats TJMBMDMGMK; Ridom spa type t0…
2018-10-25	649386	NRS18	S. aureus	MRSA / VISA	0.5	0.5	16	64	8	4	2	>32		New Jersey, USA, 1998	Positive: mec (subtype II); Negative: vanA, vanB, vanC1, vanC2, vanD, and vanE	S. aureus, strain HIP06854 is a vancomycin-intermediate S. aureus (VISA) strain. S. aureus, strain HIP06854 was deposited as positive for mec (subtype II); negative for vanA, vanB, vanC1, vanC2, vanD, and vanE; MLST sequencing type (ST) 5; eGenomic spa type 2, eGenomic spa repeats TJMBMDMGMK; Ridom spa type t002.
2018-10-25	649387	NRS19	S. aureus	MRSA / VISA	0.5	0.25	32	>64	4	16	0.5	>32		Illinois, USA, 1999	Positive: mec (subtype II); Negative: vanA, vanB, vanC1, vanC2, vanD, and vanE	S. aureus, strain HIP07256 is a vancomycin-intermediate S. aureus (VISA) strain. S. aureus, strain HIP07256 was deposited as positive for mec (subtype II); negative for vanA, vanB, vanC1, vanC2, vanD, and vanE; MLST sequencing type (ST) 5; eGenomic spa type 2, eGenomic spa repeats TJMBMDMGMK; Ridom spa type t002.
2018-10-25	649388	NRS21	S. aureus	MRSA / VISA	1	0.25	8	>64	4	2	1	0.5		Rhode Island, USA, 1999	Positive: mec (subtype IV); Negative: vanA, vanB, vanC1, vanC2, vanD, and vanE	S. aureus, strain HIP07920 is a vancomycin-intermediate S. aureus (VISA) strain. S. aureus, strain HIP07920 was deposited as positive for mec (subtype IV); negative for vanA, vanB, vanC1, vanC2, vanD, and vanE; MLST sequencing type (ST) 8; eGenomic spa type 7, eGenomic spa repeats YHGCMBQBLO; Ridom spa type t064.
2018-10-25	649389	NRS22	S. aureus	MRSA / VISA	0.5	0.5	16	16	8	16	1	>32	USA600	New York, USA, 1999	Resistant to erythromycin, clindamycin, trimethoprim/sulfamethoxazole, gentamicin and levofloxacin; Positive: mec (subtype II); Negative: PVL, tsst, sea, seb, sec, sed and see	S. aureus, strain HIP07930 is a hosptial-acquired methicillin-resistant S. aureus (HA-MRSA) strain. Strain HIP07930 was deposited as resistant to erythromycin, clindamycin, trimethoprim/sulfamethoxazole, gentamicin and levofloxacin; positive for mec (subtype II); negative for PVL, tsst, sea, seb, sec, sed and see; MLST sequence type (ST) 45; pulsed-field type USA600; eGenomic spa type 10, eGenomi…
2018-10-25	649390	NRS23	S. aureus	MRSA / VISA	0.5	0.5	16	>64	4	4	2	>32		California, USA, 2000	Positive: mec (subtype II); Negative: vanA, vanB, vanC1, vanC2, vanD, and vanE	S. aureus, strain HIP08926 is a vancomycin-intermediate S. aureus (VISA) strain. S. aureus, strain HIP08926 was deposited as positive for mec (subtype II); negative for vanA, vanB, vanC1, vanC2, van D, and vanE; MLST sequencing type (ST) 5; eGenomic spa type 12, eGenomic spa repeats TJMGMK; Ridom spa type t062.
2018-10-25	649391	NRS24	S. aureus	MRSA / VISA	0.5	0.25	64	>64	8	16	1	>32		Ohio, USA, 2000	Positive: mec (subtype II); Negative: vanA, vanB, vanC1, vanC2, vanD, and vanE	S. aureus, strain HIP09143 is a vancomycin-intermediate S. aureus (VISA) strain. S. aureus, strain HIP09143 was deposited as positive for mec (subtype II); negative for vanA, vanB, vanC1, vanC2, vanD, and vanE; MLST sequencing type (ST) 5; eGenomic spa type 230, eGenomic spa repeats TMBMDMGMK; Ridom spa type t010.
2018-10-25	649392	NRS26	S. aureus	MRSA / VSSA	0.5	0.5	8	>64	2	2	1	>32		Texas, USA, 2000	Resistant to: ciprofloxacin, gentamicin, oxacillin, penicillin, trimethoprim/sulfamethoxazole; Susceptible to vancomycin; Positive: mec (subtype ?); Negative: vanA, vanB, vanC1, vanC2, vanD, and vanE
2018-10-25	1308248	NRS27	S. aureus	MRSA / VISA	1	0.5	32	>64	4	16	2	>32		Michigan, USA, 2000	Positive: mec (subtype II); Negative: vanA, vanB, vanC1, vanC2, vanD, and vanE	S. aureus, strain HIP09433 is a vancomycin-intermediate S. aureus (VISA) strain. S. aureus, strain HIP09433 was deposited as positive for mec (subtype II); negative for vanA, vanB, vanC1, vanC2, vanD, and vanE; MLST sequencing type (ST) 45; eGenomic spa type 15, eGenomic spa repeats A2AKEEMBKB; Ridom spa type t004.
2018-10-25	1308249	NRS28	S. aureus	MSSA / VISA	1	1	32	2	4	8	0.5	>32		West Virginia, USA, 2000	Resistant to: ciprofloxacin, gentamicin, oxacillin, penicillin, trimethoprim/sulfamethoxazole; Susceptible to vancomycin; Positive: mec (subtype ?); Negative: vanA, vanB, vanC1, vanC2, vanD, and vanE
2018-10-25	1308250	NRS29	S. aureus	MRSA / VISA	0.5	0.25	16	>64	4	4	1	>32		North Carolina, USA, 2000	Positive: SCCmec (subtype II); Negative: vanA, vanB, vanC1, vanC2, vanD, and vanE	S. aureus, strain HIP09735 was deposited as a vancomycin-intermediate S. aureus (VISA) strain. S. aureus, strain HIP09735 was deposited as positive for SCCmec (subtype II); negative for vanA, vanB, vanC1, vanC2, vanD and vanE; MLST sequencing type (ST) 36; eGenomic spa type 205, eGenomic spa repeats WGKAKAOMQQQQ; Ridom spa type t253.
2018-10-25	1308251	NRS37	S. aureus	MRSA / VISA	0.5	0.5	32	8	4	16	1	>32		France, 1995	Positive: mec (subtype I); Negative: vanA, vanB, vanC1, vanC2, vanD, and vanE	S. aureus, strain LIM 3 is a methicillin-resistant S. aureus (MRSA) and a vancomycin-intermediate S. aureus(VISA) strain. S. aureus, strain LIM 3 was deposited as positive for mec (subtype I); negative for vanA, vanB, vanC1, vanC2, vanD, and vanE; MLST sequence type (ST) 247, eGenomic spa type 4, eGenomic sparepeats YHFGFMBQBLO; Ridom spa type t051. Strain LIM 3 was the third MRSA isolate recover…
2018-11-07	1308252	NRS52	S. aureus	MSSA / VSSA*	0.12	0.12	0.25	0.12	2	0.06	1	0.25		California, USA, 2000	Negative: mecA, vanA, vanB, vanC1, vanC2, vanD and vanE	S. aureus, strain HIP09737 is a vancomycin-intermediate S. aureus (VISA) strain. S. aureus, strain HIP09737 was deposited as negative for mecA, vanA, vanB, vanC1, vanC2, vanD and vanE; MLST sequencing type (ST) 5; eGenomic spa type 24, eGenomic spa repeats TJMEMDMGMK; Ridom spa type t242. Strain HIP09737 is reported to be sensitive to quinupristin/dalfopristin, oxacillin, gentamicin, tetracycline…
2018-11-07	1308253	NRS54	S. aureus	MRSA / VSSA*	0.25	0.12	8	>64	2	2	1	>32		Brazil, 1998	Positive: mec (subtype III); Negative: vanA, vanB, vanC1, vanC2, vanD, and vanE	S. aureus, strain BR 15 is a vancomycin-intermediate S. aureus (VISA) strain. S. aureus, strain BR 15 was deposited as positive for mec (subtype III); negative for the vancomycin resistance genes; MLST sequencing type (ST) 239; eGenomic spa type 3, eGenomic spa repeats WGKAOMQ; Ridom spa type t037.
2018-10-25	1308254	NRS56	S. aureus	MRSA / VISA	0.5	0.25	8	>64	4	2	1	>32		Brazil, 1999	Positive: mec (subtype III); Negative: vanA, vanB, vanC1, vanC2, vanD, and vanE	S. aureus, strain BR 5 is a methicillin-resistant S. aureus (MRSA) strain and a vancomycin-intermediate S. aureus (VISA) strain. It is also reported to be resistant to a number of other antibiotics. S. aureus, strain BR 5 was deposited as positive for mec (subtype III); negative for the vancomycin resistance genes; MLST sequencing type (ST) 239; eGenomic spa type 3, eGenomic spa repeats WGKAOMQ; …
2018-10-25	672230	VRS1	S. aureus	MRSA / VRSA	0.5	0.25	32	>64	>64	16	1	>32	USA100	Michigan, USA, 2002	Positive: mec (subtype II), vanA; Negative: vanB, vanC1, vanC2, vanD, vanE, PVL and arginine catabolic mobile element (ACME)	S. aureus, strain HIP11714 is a vancomycin-resistant S. aureus (VRSA) strain and is reported to be resistant to a number of other antimicrobial agents. S. aureus, strain HIP11714 was deposited as positive for mec(subtype II) and vanA; negative for vanB, vanC1, vanC2, vanD, vanE, PVL and arginine catabolic mobile element (ACME); pulsed-field type USA100; MLST (ST) 5; spa repeats TJMGMK; Ridom spa …
2018-10-25	672231	VRS2	S. aureus	MRSA / VRSA	0.5	0.25	32	>64	>64	4	1	>32	USA100	Pennsylvania, USA, 2002	Positive: mec (subtype II), vanA; Negative: vanB, vanC1, vanC2, vanD, vanE, PVL and arginine catabolic mobile element (ACME)	S. aureus, strain HIP11983 is a vancomycin-resistant S. aureus (VRSA) strain. S. aureus, strain HIP11983 was deposited as positive for mec (subtype II) and vanA; negative for vanB, vanC1, vanC2, vanD, vanE, PVL and arginine catabolic mobile element (ACME) genes; pulsed-field type USA100; spa repeats TJMBMDMGMK; Ridom spa type t002. S. aureus, strain HIP11983 is a USA100 isolate. USA100 isolates h…
2018-10-25	672233	VRS3b	S. aureus	MRSA / VRSA	0.25	0.06	16	>64	>64	4	1	>32	USA800	New York, USA, 2004	Positive: mec (subtype IV), vanA and resistance genes against tetracycline, macrolides, lincosamides and aminoglycosides; Negative: vanB, vanC1, vanC2, vanD and vanE	S. aureus, strain HIP13419 is a vancomycin-resistant S. aureus (VRSA) strain. S. aureus, strain HIP13419 was deposited as positive for mec (subtype IV), vanA and resistance genes against tetracycline, macrolides, lincosamides and aminoglycosides; negative for vanB, vanC1, vanC2, vanD and vanE; pulsed-field type USA800; MLST (ST) 5; spa repeats TJMBMDMGMK; Ridom spa type t002.
2018-10-25	672234	VRS4	S. aureus	MRSA / VRSA	0.5	0.25	>64	>64	>64	32	2	>32	USA100	Michigan, USA, 2005	Positive: mec (subtype II), vanA; Negative: vanB, vanC1, vanC2, vanD, vanE, PVL and arginine catabolic mobile element (ACME)	S. aureus, strain HIP14300 is a vancomycin-resistant S. aureus (VRSA) strain. S. aureus, strain HIP14300 was deposited as positive for mec (subtype II) and vanA; negative for vanB, vanC1, vanC2, vanD, vanE, PVL and arginine catabolic mobile element (ACME); pulsed-field type USA100; spa repeats TJMBMDMGMK; Ridom spa type t002. S. aureus, strain HIP14300 is a USA100 isolate. USA100 isolates have th…
2018-10-25	672235	VRS5	S. aureus	MRSA / VRSA	1	0.25	64	>64	>64	8	2	>32	USA100	Michigan, USA, 2005	Positive: mec (subtype II), vanA; Negative: vanB, vanC1, vanC2, vanD, vanE, PVL and arginine catabolic mobile element (ACME)	S. aureus, strain HIP15178 is a vancomycin-resistant S. aureus (VRSA) strain. S. aureus, strain HIP15178 was deposited as positive for mec (subtype II) and vanA; negative for vanB, vanC1, vanC2, vanD, vanE, PVL and arginine catabolic mobile element (ACME); pulsed-field type USA100; spa repeats TJMBMDMGMK; Ridom spa type t002. S. aureus, strain HIP15178 is a USA100 isolate. USA100 isolates have th…
2018-10-25	672236	VRS6	S. aureus	MSSA / VRSA	0.25	0.12	32	2	>64	8	1	>32	USA100	Michigan, USA, 2005	Positive: mec (subtype II), vanA; Negative: vanB, vanC1, vanC2, vanD, vanE, PVL and arginine catabolic mobile element (ACME)	S. aureus, strain AIS2006032 is a vancomycin-resistant S. aureus (VRSA) strain. S. aureus, strain AIS2006032 was deposited as positive for vanA; negative for vanB, vanC1, vanC2, vanD, vanE, PVL and arginine catabolic mobile element (ACME); pulsed-field type USA100; spa repeats TJMGMK; Ridom spatype t062. Originally, the SCCmec locus was classified as non-typable, but later analysis, based on the …
2018-10-25	672237	VRS7	S. aureus	MRSA / VRSA	0.5	0.25	64	>64	>64	8	2	>32	USA100	Michigan, USA, 2006	Positive: mec (subtype II), vanA; Negative: vanB, vanC1, vanC2, vanD, vanE, PVL and arginine catabolic mobile element (ACME)	S. aureus, strain AIS 2006045 is a vancomycin-resistant S. aureus (VRSA) strain and is reported to be resistant to a number of other antimicrobial agents. S. aureus, strain AIS 2006045 was deposited as positive for mec (subtype II) and vanA; negative for vanB, vanC1, vanC2, vanD, vanE, PVL and arginine catabolic mobile element (ACME); pulsed-field type USA100; spa repeats TJMBMDMGMK; Ridom spa ty…
2018-10-25	672238	VRS8	S. aureus	MRSA / VRSA	0.5	0.25	16	>64	>64	4	1	>32	USA100	Michigan, USA, 2007	Positive: mec (subtype II), vanA; Negative: vanB, vanC1, vanC2, vanD, vanE, PVL and arginine catabolic mobile element (ACME)	S. aureus, strain 71080 is a vancomycin-resistant S. aureus (VRSA) strain. S. aureus, strain 71080 was deposited as positive for mec and vanA; negative for vanB, vanC1, vanC2, vanD, vanE, PVL and arginine catabolic mobile element (ACME); pulsed-field type USA100; spa repeats TJMBMDMGMK; Ridom spa type t002. S. aureus, strain 71080 is a USA100 isolate.
2018-10-25	672239	VRS9	S. aureus	MRSA / VRSA	0.5	0.25	64	>64	>64	8	1	>32	USA100	Michigan, USA, 2007	Positive: mec (subtype II), vanA; Negative: vanB, vanC1, vanC2, vanD, vanE, PVL and arginine catabolic mobile element (ACME)	S. aureus, strain AIS 080003 is a vancomycin-resistant S. aureus strain. S. aureus, strain AIS 080003 was deposited as positive for mec and vanA; negative for vanB, vanC1, vanC2, vanD, vanE, PVL and arginine catabolic mobile element (ACME); pulsed-field type USA100; spa repeats TJMBMDMGMK; Ridom spa type t002. S. aureus, strain AIS 080003 is a USA100 isolate. USA100 isolates have the same MLST pr…
2018-10-25	1308256	VRS10	S. aureus	MRSA / VRSA	1	0.5	>64	>64	>64	8	4	>32	USA100	Michigan, USA, 2009	Positive: mec (subtype II), vanA; Negative: vanB, vanC1, vanC2, vanD, vanE, PVL and arginine catabolic mobile element (ACME)	S. aureus, strain AIS 1000505 is a vancomycin-resistant S. aureus (VRSA) strain. S. aureus, strain AIS 1000505 was deposited as positive for mec and vanA; negative for vanB, PVL and arginine catabolic mobile element (ACME); pulsed-field type USA100; spa repeats TJMBMDMGMK; Ridom spa type t002. S. aureus, strain AIS 1000505 is a USA100 isolate. USA100 isolates have the same MLST profile (ST 5), SC…
2018-10-25	1308258	VRS11b	S. aureus	MRSA / VRSA	0.5	0.25	>64	16	>64	32	1	>32	USA100	Delaware, USA, 2010	Positive: mec (subtype II), vanA; Negative: vanB, vanC1, vanC2, vanD, vanE, PVL and arginine catabolic mobile element (ACME)	S. aureus, strain AID 1001123 is a vancomycin-resistant S. aureus (VRSA) strain. S. aureus, strain AID 1001123 was deposited as positive for mecA and vanA; negative for vanB, PVL and arginine catabolic mobile element (ACME); pulsed-field type USA100; spa repeats TJMBMDMGMK; Ridom spa type t002. S. aureus, strain AID 1001123 is a USA100 isolate. USA100 isolates have the same MLST profile (ST 5) an…
2018-10-25	1308244	NRS12	S. aureus	MSSA / VISA	1	0.5	0.5	0.25	4	0.12	4	0.5		France, 1998	Negative: mec, vanA, vanB, vanC1, vanC2, vanD and vanE; Resistant to benzylpenicillin	S. aureus, strain SA MER-S6 is a heterogeneous vancomycin-intermediate S. aureus (hVISA) strain, but unlike most hVISA strains, it is susceptible to methicillin. S. aureus, strain SA MER-S6 was deposited as resistant to benzylpenicillin; negative for mec, vanA, vanB, vanC1, vanC2, vanD and vanE; MLST sequencing type (ST) 5; eGenomic spa type 2, eGenomic spa repeats TJMBMDMGMK; Ridom spa type t002.
2018-10-25	1308246	NRS14	S. aureus	MSSA / VISA	1	1	0.5	0.25	4	0.12	2	0.5		France, 1998	Negative: mec, vanA, vanB, vanC1, vanC2, vanD and vanE; Resistant to benzylpenicillin	S. aureus, strain SA MER-S20 is a vancomycin-intermediate S. aureus (VISA) strain, but unlike most VISA strains, it is susceptible to methicillin. S. aureus, strain SA MER-S20 was deposited as resistant to benzylpenicillin; negative for mec, vanA, vanB, vanC1, vanC2, vanD and vanE; MLST sequencing type (ST) 5; eGenomic spa type 2, eGenomic spa repeats TJMBMDMGMK; Ridom spa type t002.
2018-10-25	1308247	NRS17	S. aureus	MSSA / VISA	1	1	16	2	8	4	2	8		New York, USA, 1998	Positive: mec (subtype II); Negative: vanA, vanB, vanC1, vanC2, vanD, and vanE; Resistant to erythromycin, ciprofloxacin and rifampin and susceptible to trimethoprim/sulfamethoxazole, chloramphenicol and tetracycline	S. aureus, strain HIP06297 is a vancomycin-intermediate S. aureus (VISA) strain. S. aureus, strain HIP06297 was deposited as positive for mec (subtype II); negative for the vancomycin resistance genes; MLST sequencing type (ST) 5; eGenomic spa type 2, eGenomic spa repeats TJMBMDMGMK; Ridom spatype t002. S. aureus, strain HIP06297 is reported to be resistant to erythromycin, ciprofloxacin and rifa…
2018-10-25	1766357	-	S. aureus	MRSA / VSSA	0.25	0.12	16	32	1	8	4	1
2018-10-25	1569509	-	S. aureus	MRSA / VSSA	0.25	0.12	4	>64	1	2	4	>32
2018-10-25	1569499	-	S. aureus	MSSA / VSSA	1	0.5	0.25	1	1	0.03	2	0.5
2018-10-25	1666371	-	S. aureus	MRSA / VSSA	0.5	0.25	>64	16	1	16	0.5	0.25
2018-10-25	1583795	-	S. aureus	MRSA / VSSA	1	1	32	>64	1	4	1	>32
2018-10-25	1602078	-	S. aureus	MSSA / VSSA	0.5	0.5	32	1	1	4	4	>32
2018-10-25	1602095	-	S. aureus	MRSA / VSSA	0.5	0.25	0.25	32	1	0.06	4	>32
2018-10-25	1591462	-	S. aureus	MRSA / VSSA	0.25	0.12	32	32	1	16	4	1
2018-10-25	1591459	-	S. aureus	MSSA / VSSA	0.5	0.25	16	0.25	1	8	2	0.5
2018-10-25	1594297	-	S. aureus	MSSA / VSSA	1	1	0.25	0.5	1	0.06	2	32
2018-10-25	1620441	-	S. aureus	MRSA / VSSA	0.5	0.25	32	>64	2	8	1	>32
2018-10-25	1575629	-	S. aureus	MRSA / VSSA	0.5	0.25	8	64	1	2	4	1
2018-10-25	1575652	-	S. aureus	MSSA / VSSA	0.5	0.25	0.25	1	1	0.06	4	1
2018-10-25	1577820	-	S. aureus	MRSA / VSSA	1	0.5	>64	32	1	16	2	>32
2018-10-25	1577800	-	S. aureus	MSSA / VSSA	0.5	0.25	0.25	0.5	1	0.06	4	1
2018-10-25	1575779	-	S. aureus	MSSA / VSSA	1	0.5	0.25	0.5	1	0.06	2	>32
2018-10-25	1582100	-	S. aureus	MRSA / VSSA	0.5	0.25	32	>64	1	4	2	>32
2018-10-25	1622527	-	S. aureus	MRSA / VSSA	0.25	0.25	0.25	32	1	0.03	4	1
2018-10-25	1582691	-	S. aureus	MSSA / VSSA	0.25	0.25	0.25	0.25	2	0.06	2	>32
2018-10-25	1626392	-	S. aureus	MSSA / VSSA	1	0.5	0.25	0.5	1	0.06	2	0.5
2018-10-25	1611170	-	S. aureus	MRSA / VSSA	0.5	0.25	0.25	16	1	0.06	2	>32
2018-10-25	1575268	-	S. aureus	MRSA / VSSA	1	0.25	32	>64	1	8	2	>32
2018-10-25	1597106	-	S. aureus	MRSA / VSSA	1	0.5	16	>64	2	4	1	>32
2018-10-25	1597120	-	S. aureus	MSSA / VSSA	1	0.5	0.25	0.25	1	0.12	4	>32
2018-10-25	1597125	-	S. aureus	MSSA / VSSA	1	0.5	0.25	0.5	1	0.015	2	>32
2018-10-25	1586780	-	S. aureus	MRSA / VSSA	0.5	0.25	16	32	1	4	1	1
2018-10-25	1587279	-	S. aureus	MSSA / VSSA	0.5	0.5	0.25	0.25	2	0.12	1	1
2018-10-25	1565492	-	S. aureus	MSSA / VSSA	0.25	0.12	0.25	0.25	2	0.06	2	1
2018-10-25	1703428	-	S. aureus	MRSA / VSSA	1	0.5	0.25	64	2	0.06	2	0.5
2018-10-25	1720350	-	S. aureus	MRSA / VSSA	1	0.5	0.25	32	1	0.06	2	32
2018-10-25	1599157	-	S. aureus	MSSA / VSSA	1	0.5	0.25	0.5	1	0.06	2	1
2018-10-25	1563826	-	S. aureus	MSSA / VSSA	0.5	0.25	0.25	0.25	1	0.06	4	1
2018-10-25	1732989	-	S. aureus	MRSA / VSSA	1	0.5	64	>64	2	16	4	>32
2018-10-25	1621638	-	S. aureus	MRSA / VSSA	1	0.5	0.25	32	1	0.06	2	1
2018-10-25	1587322	-	S. aureus	MRSA / VSSA	0.5	0.25	0.25	>64	1	0.03	2	>32
2018-10-25	1622252	-	S. aureus	MRSA / VSSA	1	0.5	16	>64	1	2	4	1
2018-10-25	1742231	-	S. aureus	MRSA / VSSA	0.5	0.12	>64	>64	1	32	2	>32
2018-10-25	1582586	-	S. aureus	MSSA / VSSA	1	0.5	0.5	0.5	1	0.25	8	1
2018-10-25	1578560	-	S. aureus	MSSA / VSSA	1	0.5	0.25	0.5	1	0.06	4	1
2018-10-25	1574202	-	S. aureus	MSSA / VSSA	0.5	0.25	0.25	2	1	0.03	2	0.5
2018-10-25	1576329	-	S. aureus	MSSA / VSSA	1	0.5	0.25	0.5	1	0.06	4	1
2018-10-25	1584223	-	S. aureus	MRSA / VSSA	1	0.5	8	>64	2	4	4	32
2018-10-25	1584230	-	S. aureus	MSSA / VSSA	1	0.5	0.25	0.5	1	0.03	4	1
2018-10-25	1569754	-	S. aureus	MSSA / VSSA	0.25	0.12	16	1	2	4	2	>32
2018-10-25	1599506	-	S. aureus	MSSA / VSSA	0.12	0.12	0.25	0.5	2	0.06	4	1
2018-10-25	1592749	-	S. aureus	MSSA / VSSA	1	0.5	0.25	0.25	1	0.03	2	1
2018-10-25	1592751	-	S. aureus	MSSA / VSSA	0.5	0.25	0.25	0.5	1	0.06	4	1
2018-10-25	1592755	-	S. aureus	MRSA / VSSA	0.5	0.5	16	>64	1	2	2	0.5
2018-10-25	1592776	-	S. aureus	MRSA / VSSA	0.5	0.25	0.25	32	1	0.06	2	>32
2018-10-25	1588127	-	S. aureus	MRSA / VSSA	0.5	0.25	16	32	1	4	1	0.5
2018-10-25	1612228	-	S. aureus	MRSA / VSSA	0.5	0.25	8	>64	1	2	2	16
2018-10-25	1580233	-	S. aureus	MSSA / VSSA	0.25	0.12	0.25	0.5	1	0.06	2	>32
2018-10-25	1580300	-	S. aureus	MRSA / VSSA	0.5	0.12	16	>64	2	4	0.5	0.5
2018-10-25	1611612	-	S. aureus	MRSA / VSSA	0.5	0.25	32	>64	1	4	4	>32
2018-10-25	1609919	-	S. aureus	MSSA / VSSA	0.5	0.25	0.25	0.25	1	0.03	2	>32
2018-10-25	1585316	-	S. aureus	MRSA / VSSA	0.25	0.25	32	>64	2	4	2	>32
2018-10-25	1695391	-	S. aureus	MRSA / VSSA	0.25	0.12	>64	>64	2	32	2	>32
2018-10-25	1622864	-	S. aureus	MSSA / VSSA	0.5	0.25	0.25	0.5	1	0.06	2	1
2018-10-25	1713793	-	S. aureus	MSSA / VSSA	1	0.5	0.25	0.5	1	0.03	2	1
2018-10-25	1604586	-	S. aureus	MSSA / VSSA	0.5	0.25	0.25	0.5	1	0.06	2	0.25
2018-10-25	1604609	-	S. aureus	MSSA / VSSA	0.5	0.5	0.25	0.25	1	0.06	2	1
2018-10-25	1580925	-	S. aureus	MSSA / VSSA	0.25	0.25	0.25	0.5	1	0.015	2	1
2018-10-25	1580940	-	S. aureus	MRSA / VSSA	0.5	0.5	0.5	32	1	0.06	2	>32
2018-10-25	1580955	-	S. aureus	MSSA / VSSA	1	0.5	0.25	0.5	1	0.06	2	1
*Expected VAN intermediate, confirmed VAN susceptible twice
