# Supplementary material for: Rational design of balanced dual-targeting antibiotics with limited resistance
Source: PLoS Biol. 2020 Oct 5;18(10):e3000819. doi: 10.1371/journal.pbio.3000819 (PMC7561186; doi:10.1371/journal.pbio.3000819)
Supplement: S2 Data — (XLSX) [file pbio.3000819.s020.xlsx]

## Sheet: Fig 2A.
	Cumulative % of MIC (µg/mL)
Drug	≤0.008	0.015	0.03	0.06	0.12	0.25	0.5	1	2	4	8	16	32	64	>64
ULD-1					2.1	16.8	64.2	100
ULD-2				1.1	14.7	56.8	94.7	100
Levofloxacin						38.9	44.2			45.3	52.6	70.5	87.4	92.6	100
Oxacillin					1.1	12.6	32.6	36.8	41.1		42.1	46.3	57.9	61.1	100
Vancomycin								53.7	70.5	83.2	88.4				100
Moxifloxacin		2.1	10.5	37.9	43.2	44.2			53.7	73.7	85.3	95.8	100
Linezolid							4.2	29.5	75.8	98.9	100
Azithromycin						3.2	14.7	42.1			43.2	44.2	47.4	100
For detailed MIC data see Supplementary File 1

## Sheet: Fig 2B.
Strain	For	Treatment	Antibiotic	Multiple
Staphylococcus aureus (MRSA) ATCC 43300	1.12857e-08	Novobiocin, 2xMIC	Novobiocin	2
Staphylococcus aureus (MRSA) ATCC 43300	9e-09	Novobiocin, 2xMIC	Novobiocin	2
Staphylococcus aureus (MRSA) ATCC 43300	8.26667e-09	Novobiocin, 2xMIC	Novobiocin	2
Staphylococcus aureus (MRSA) ATCC 43300	1.45556e-08	Novobiocin, 2xMIC	Novobiocin	2
Staphylococcus aureus (MRSA) ATCC 43300	2.7e-08	Novobiocin, 2xMIC	Novobiocin	2
Staphylococcus aureus (MRSA) ATCC 43300	7.56667e-09	Novobiocin, 2xMIC	Novobiocin	2
Staphylococcus aureus (MRSA) ATCC 43300	3.75e-09	Novobiocin, 2xMIC	Novobiocin	2
Staphylococcus aureus (MRSA) ATCC 43300	3.21019e-09	Novobiocin, 2xMIC	Novobiocin	2
Staphylococcus aureus (MRSA) ATCC 43300	7.06468e-09	Novobiocin, 2xMIC	Novobiocin	2
Staphylococcus aureus (MRSA) ATCC 43300	1e-06	Novobiocin, 2xMIC	Novobiocin	2
Staphylococcus aureus (MRSA) ATCC 43300	9.5e-09	Novobiocin, 4xMIC	Novobiocin	4
Staphylococcus aureus (MRSA) ATCC 43300	9.46154e-09	Novobiocin, 4xMIC	Novobiocin	4
Staphylococcus aureus (MRSA) ATCC 43300	6.2e-09	Novobiocin, 4xMIC	Novobiocin	4
Staphylococcus aureus (MRSA) ATCC 43300	1.16667e-08	Novobiocin, 4xMIC	Novobiocin	4
Staphylococcus aureus (MRSA) ATCC 43300	2.28e-08	Novobiocin, 4xMIC	Novobiocin	4
Staphylococcus aureus (MRSA) ATCC 43300	4.13333e-09	Novobiocin, 4xMIC	Novobiocin	4
Staphylococcus aureus (MRSA) ATCC 43300	7e-09	Novobiocin, 4xMIC	Novobiocin	4
Staphylococcus aureus (MRSA) ATCC 43300	1.7e-08	Novobiocin, 4xMIC	Novobiocin	4
Staphylococcus aureus (MRSA) ATCC 43300	1.83e-08	Novobiocin, 4xMIC	Novobiocin	4
Staphylococcus aureus (MRSA) ATCC 43300	1.36e-08	Novobiocin, 4xMIC	Novobiocin	4
Staphylococcus aureus (MRSA) ATCC 43300	5.14286e-09	Novobiocin, 8xMIC	Novobiocin	8
Staphylococcus aureus (MRSA) ATCC 43300	9.53846e-09	Novobiocin, 8xMIC	Novobiocin	8
Staphylococcus aureus (MRSA) ATCC 43300	8.33333e-09	Novobiocin, 8xMIC	Novobiocin	8
Staphylococcus aureus (MRSA) ATCC 43300	1.71e-08	Novobiocin, 8xMIC	Novobiocin	8
Staphylococcus aureus (MRSA) ATCC 43300	2.23077e-09	Novobiocin, 8xMIC	Novobiocin	8
Staphylococcus aureus (MRSA) ATCC 43300	7.89474e-10	Novobiocin, 8xMIC	Novobiocin	8
Staphylococcus aureus (MRSA) ATCC 43300	1.41401e-09	Novobiocin, 8xMIC	Novobiocin	8
Staphylococcus aureus (MRSA) ATCC 43300	3.38308e-09	Novobiocin, 8xMIC	Novobiocin	8
Staphylococcus aureus (MRSA) ATCC 43300	3.03279e-09	Novobiocin, 8xMIC	Novobiocin	8
Staphylococcus aureus (MRSA) ATCC 43300	1.02e-08	Novobiocin, 8xMIC	Novobiocin	8
Staphylococcus aureus (MRSA) ATCC 43300	2e-09	ULD1, 2xMIC	ULD1	2
Staphylococcus aureus (MRSA) ATCC 43300	2.76923e-09	ULD1, 2xMIC	ULD1	2
Staphylococcus aureus (MRSA) ATCC 43300	5.33333e-10	ULD1, 2xMIC	ULD1	2
Staphylococcus aureus (MRSA) ATCC 43300	1.1e-09	ULD1, 2xMIC	ULD1	2
Staphylococcus aureus (MRSA) ATCC 43300	1.26316e-09	ULD1, 2xMIC	ULD1	2
Staphylococcus aureus (MRSA) ATCC 43300	2.58706e-09	ULD1, 2xMIC	ULD1	2
Staphylococcus aureus (MRSA) ATCC 43300	2.78689e-09	ULD1, 2xMIC	ULD1	2
Staphylococcus aureus (MRSA) ATCC 43300	2.5e-09	ULD1, 2xMIC	ULD1	2
Staphylococcus aureus (MRSA) ATCC 43300	3.14e-09	ULD1, 2xMIC	ULD1	2
Staphylococcus aureus (MRSA) ATCC 43300	4.8e-09	ULD1, 2xMIC	ULD1	2
Staphylococcus aureus (MRSA) ATCC 43300	9.28571e-10	ULD1, 4xMIC	ULD1	4
Staphylococcus aureus (MRSA) ATCC 43300	7.69231e-10	ULD1, 4xMIC	ULD1	4
Staphylococcus aureus (MRSA) ATCC 43300	1.33333e-10	ULD1, 4xMIC	ULD1	4
Staphylococcus aureus (MRSA) ATCC 43300	5e-10	ULD1, 4xMIC	ULD1	4
Staphylococcus aureus (MRSA) ATCC 43300	9.86842e-10	ULD1, 4xMIC	ULD1	4
Staphylococcus aureus (MRSA) ATCC 43300	1.04478e-09	ULD1, 4xMIC	ULD1	4
Staphylococcus aureus (MRSA) ATCC 43300	7.37705e-10	ULD1, 4xMIC	ULD1	4
Staphylococcus aureus (MRSA) ATCC 43300	1.3e-09	ULD1, 4xMIC	ULD1	4
Staphylococcus aureus (MRSA) ATCC 43300	9.54e-10	ULD1, 4xMIC	ULD1	4
Staphylococcus aureus (MRSA) ATCC 43300	1.09e-08	ULD1, 4xMIC	ULD1	4
Staphylococcus aureus (MRSA) ATCC 43300	7.14e-11	ULD1, 4xMIC	ULD1	4
Staphylococcus aureus (MRSA) ATCC 43300	1e-12	ULD1, 8xMIC	ULD1	8
Staphylococcus aureus (MRSA) ATCC 43300	1e-12	ULD1, 8xMIC	ULD1	8
Staphylococcus aureus (MRSA) ATCC 43300	1e-12	ULD1, 8xMIC	ULD1	8
Staphylococcus aureus (MRSA) ATCC 43300	1e-12	ULD1, 8xMIC	ULD1	8
Staphylococcus aureus (MRSA) ATCC 43300	1e-12	ULD1, 8xMIC	ULD1	8
Staphylococcus aureus (MRSA) ATCC 43300	1e-12	ULD1, 8xMIC	ULD1	8
Staphylococcus aureus (MRSA) ATCC 43300	1e-12	ULD1, 8xMIC	ULD1	8
Staphylococcus aureus (MRSA) ATCC 43300	1e-12	ULD1, 8xMIC	ULD1	8
Staphylococcus aureus (MRSA) ATCC 43300	1e-12	ULD1, 8xMIC	ULD1	8
Staphylococcus aureus (MRSA) ATCC 43300	1e-12	ULD1, 8xMIC	ULD1	8
Staphylococcus aureus (MRSA) ATCC 43300	1e-12	ULD2, 2xMIC	ULD2	2
Staphylococcus aureus (MRSA) ATCC 43300	1.52866e-10	ULD2, 2xMIC	ULD2	2
Staphylococcus aureus (MRSA) ATCC 43300	1.99005e-10	ULD2, 2xMIC	ULD2	2
Staphylococcus aureus (MRSA) ATCC 43300	1e-12	ULD2, 2xMIC	ULD2	2
Staphylococcus aureus (MRSA) ATCC 43300	1e-12	ULD2, 2xMIC	ULD2	2
Staphylococcus aureus (MRSA) ATCC 43300	7.69231e-11	ULD2, 2xMIC	ULD2	2
Staphylococcus aureus (MRSA) ATCC 43300	9e-10	ULD2, 2xMIC	ULD2	2
Staphylococcus aureus (MRSA) ATCC 43300	1.8e-09	ULD2, 2xMIC	ULD2	2
Staphylococcus aureus (MRSA) ATCC 43300	1.43e-10	ULD2, 2xMIC	ULD2	2
Staphylococcus aureus (MRSA) ATCC 43300	1e-12	ULD2, 2xMIC	ULD2	2
Staphylococcus aureus (MRSA) ATCC 43300	5e-11	ULD2, 4xMIC	ULD2	4
Staphylococcus aureus (MRSA) ATCC 43300	1.67e-10	ULD2, 4xMIC	ULD2	4
Staphylococcus aureus (MRSA) ATCC 43300	7.14e-11	ULD2, 4xMIC	ULD2	4
Staphylococcus aureus (MRSA) ATCC 43300	1e-12	ULD2, 4xMIC	ULD2	4
Staphylococcus aureus (MRSA) ATCC 43300	1e-12	ULD2, 4xMIC	ULD2	4
Staphylococcus aureus (MRSA) ATCC 43300	1e-12	ULD2, 4xMIC	ULD2	4
Staphylococcus aureus (MRSA) ATCC 43300	1e-12	ULD2, 4xMIC	ULD2	4
Staphylococcus aureus (MRSA) ATCC 43300	1e-12	ULD2, 4xMIC	ULD2	4
Staphylococcus aureus (MRSA) ATCC 43300	1e-12	ULD2, 4xMIC	ULD2	4
Staphylococcus aureus (MRSA) ATCC 43300	1e-12	ULD2, 4xMIC	ULD2	4
Staphylococcus aureus (MRSA) ATCC 43300	1e-12	ULD2, 8xMIC	ULD2	8
Staphylococcus aureus (MRSA) ATCC 43300	1e-12	ULD2, 8xMIC	ULD2	8
Staphylococcus aureus (MRSA) ATCC 43300	1e-12	ULD2, 8xMIC	ULD2	8
Staphylococcus aureus (MRSA) ATCC 43300	1e-12	ULD2, 8xMIC	ULD2	8
Staphylococcus aureus (MRSA) ATCC 43300	1e-12	ULD2, 8xMIC	ULD2	8
Staphylococcus aureus (MRSA) ATCC 43300	1e-12	ULD2, 8xMIC	ULD2	8
Staphylococcus aureus (MRSA) ATCC 43300	1e-12	ULD2, 8xMIC	ULD2	8
Staphylococcus aureus (MRSA) ATCC 43300	1e-12	ULD2, 8xMIC	ULD2	8
Staphylococcus aureus (MRSA) ATCC 43300	1e-12	ULD2, 8xMIC	ULD2	8
Staphylococcus aureus (MRSA) ATCC 43300	1e-12	ULD2, 8xMIC	ULD2	8
Staphylococcus aureus (VISA) ATCC 700699	1.4e-09	ULD1, 2xMIC	ULD1	2
Staphylococcus aureus (VISA) ATCC 700699	7.33e-10	ULD1, 2xMIC	ULD1	2
Staphylococcus aureus (VISA) ATCC 700699	2e-09	ULD1, 2xMIC	ULD1	2
Staphylococcus aureus (VISA) ATCC 700699	1.64e-09	ULD1, 2xMIC	ULD1	2
Staphylococcus aureus (VISA) ATCC 700699	3.59447e-09	ULD1, 2xMIC	ULD1	2
Staphylococcus aureus (VISA) ATCC 700699	2.42647e-09	ULD1, 2xMIC	ULD1	2
Staphylococcus aureus (VISA) ATCC 700699	2.06009e-09	ULD1, 2xMIC	ULD1	2
Staphylococcus aureus (VISA) ATCC 700699	1.81481e-09	ULD1, 2xMIC	ULD1	2
Staphylococcus aureus (VISA) ATCC 700699	2.32639e-09	ULD1, 2xMIC	ULD1	2
Staphylococcus aureus (VISA) ATCC 700699	1.86047e-09	ULD1, 2xMIC	ULD1	2
Staphylococcus aureus (VISA) ATCC 700699	1e-12	ULD1, 4xMIC	ULD1	4
Staphylococcus aureus (VISA) ATCC 700699	1e-12	ULD1, 4xMIC	ULD1	4
Staphylococcus aureus (VISA) ATCC 700699	1e-12	ULD1, 4xMIC	ULD1	4
Staphylococcus aureus (VISA) ATCC 700699	3.10881e-10	ULD1, 4xMIC	ULD1	4
Staphylococcus aureus (VISA) ATCC 700699	2.25225e-10	ULD1, 4xMIC	ULD1	4
Staphylococcus aureus (VISA) ATCC 700699	3.24324e-10	ULD1, 4xMIC	ULD1	4
Staphylococcus aureus (VISA) ATCC 700699	3.9801e-10	ULD1, 4xMIC	ULD1	4
Staphylococcus aureus (VISA) ATCC 700699	2.30415e-10	ULD1, 4xMIC	ULD1	4
Staphylococcus aureus (VISA) ATCC 700699	2.87081e-10	ULD1, 4xMIC	ULD1	4
Staphylococcus aureus (VISA) ATCC 700699	1.67598e-10	ULD1, 4xMIC	ULD1	4
Staphylococcus aureus (VISA) ATCC 700699	1e-12	ULD1, 8xMIC	ULD1	8
Staphylococcus aureus (VISA) ATCC 700699	1e-12	ULD1, 8xMIC	ULD1	8
Staphylococcus aureus (VISA) ATCC 700699	1e-12	ULD1, 8xMIC	ULD1	8
Staphylococcus aureus (VISA) ATCC 700699	1e-12	ULD1, 8xMIC	ULD1	8
Staphylococcus aureus (VISA) ATCC 700699	1e-12	ULD1, 8xMIC	ULD1	8
Staphylococcus aureus (VISA) ATCC 700699	1e-12	ULD1, 8xMIC	ULD1	8
Staphylococcus aureus (VISA) ATCC 700699	1e-12	ULD1, 8xMIC	ULD1	8
Staphylococcus aureus (VISA) ATCC 700699	1e-12	ULD1, 8xMIC	ULD1	8
Staphylococcus aureus (VISA) ATCC 700699	1e-12	ULD1, 8xMIC	ULD1	8
Staphylococcus aureus (VISA) ATCC 700699	1e-12	ULD1, 8xMIC	ULD1	8
Staphylococcus aureus (VISA) ATCC 700699	1e-12	ULD2, 2xMIC	ULD2	2
Staphylococcus aureus (VISA) ATCC 700699	1e-12	ULD2, 2xMIC	ULD2	2
Staphylococcus aureus (VISA) ATCC 700699	1e-12	ULD2, 2xMIC	ULD2	2
Staphylococcus aureus (VISA) ATCC 700699	1e-12	ULD2, 2xMIC	ULD2	2
Staphylococcus aureus (VISA) ATCC 700699	1e-12	ULD2, 2xMIC	ULD2	2
Staphylococcus aureus (VISA) ATCC 700699	1e-12	ULD2, 2xMIC	ULD2	2
Staphylococcus aureus (VISA) ATCC 700699	1e-12	ULD2, 2xMIC	ULD2	2
Staphylococcus aureus (VISA) ATCC 700699	1e-12	ULD2, 2xMIC	ULD2	2
Staphylococcus aureus (VISA) ATCC 700699	1e-12	ULD2, 2xMIC	ULD2	2
Staphylococcus aureus (VISA) ATCC 700699	8.77193e-11	ULD2, 2xMIC	ULD2	2
Staphylococcus aureus (VISA) ATCC 700699	1e-12	ULD2, 4xMIC	ULD2	4
Staphylococcus aureus (VISA) ATCC 700699	1e-12	ULD2, 4xMIC	ULD2	4
Staphylococcus aureus (VISA) ATCC 700699	1e-12	ULD2, 4xMIC	ULD2	4
Staphylococcus aureus (VISA) ATCC 700699	1e-12	ULD2, 4xMIC	ULD2	4
Staphylococcus aureus (VISA) ATCC 700699	1e-12	ULD2, 4xMIC	ULD2	4
Staphylococcus aureus (VISA) ATCC 700699	1e-12	ULD2, 4xMIC	ULD2	4
Staphylococcus aureus (VISA) ATCC 700699	1e-12	ULD2, 4xMIC	ULD2	4
Staphylococcus aureus (VISA) ATCC 700699	1e-12	ULD2, 4xMIC	ULD2	4
Staphylococcus aureus (VISA) ATCC 700699	1e-12	ULD2, 4xMIC	ULD2	4
Staphylococcus aureus (VISA) ATCC 700699	1e-12	ULD2, 4xMIC	ULD2	4
Staphylococcus aureus (VISA) ATCC 700699	1e-12	ULD2, 8xMIC	ULD2	8
Staphylococcus aureus (VISA) ATCC 700699	1e-12	ULD2, 8xMIC	ULD2	8
Staphylococcus aureus (VISA) ATCC 700699	1e-12	ULD2, 8xMIC	ULD2	8
Staphylococcus aureus (VISA) ATCC 700699	1e-12	ULD2, 8xMIC	ULD2	8
Staphylococcus aureus (VISA) ATCC 700699	1e-12	ULD2, 8xMIC	ULD2	8
Staphylococcus aureus (VISA) ATCC 700699	1e-12	ULD2, 8xMIC	ULD2	8
Staphylococcus aureus (VISA) ATCC 700699	1e-12	ULD2, 8xMIC	ULD2	8
Staphylococcus aureus (VISA) ATCC 700699	1e-12	ULD2, 8xMIC	ULD2	8
Staphylococcus aureus (VISA) ATCC 700699	1e-12	ULD2, 8xMIC	ULD2	8
Staphylococcus aureus (VISA) ATCC 700699	1e-12	ULD2, 8xMIC	ULD2	8
Staphylococcus aureus (VISA) ATCC 700699	2.94118e-09	Novobiocin, 2xMIC	Novobiocin	2
Staphylococcus aureus (VISA) ATCC 700699	1.86364e-09	Novobiocin, 2xMIC	Novobiocin	2
Staphylococcus aureus (VISA) ATCC 700699	6.30952e-09	Novobiocin, 2xMIC	Novobiocin	2
Staphylococcus aureus (VISA) ATCC 700699	1.66667e-09	Novobiocin, 2xMIC	Novobiocin	2
Staphylococcus aureus (VISA) ATCC 700699	4.10138e-09	Novobiocin, 2xMIC	Novobiocin	2
Staphylococcus aureus (VISA) ATCC 700699	2.90441e-09	Novobiocin, 2xMIC	Novobiocin	2
Staphylococcus aureus (VISA) ATCC 700699	3.90558e-09	Novobiocin, 2xMIC	Novobiocin	2
Staphylococcus aureus (VISA) ATCC 700699	3.35e-09	Novobiocin, 2xMIC	Novobiocin	2
Staphylococcus aureus (VISA) ATCC 700699	3.35e-09	Novobiocin, 2xMIC	Novobiocin	2
Staphylococcus aureus (VISA) ATCC 700699	3.35e-09	Novobiocin, 2xMIC	Novobiocin	2
Staphylococcus aureus (VISA) ATCC 700699	9.319e-10	Novobiocin, 4xMIC	Novobiocin	4
Staphylococcus aureus (VISA) ATCC 700699	7.87402e-10	Novobiocin, 4xMIC	Novobiocin	4
Staphylococcus aureus (VISA) ATCC 700699	2.5e-09	Novobiocin, 4xMIC	Novobiocin	4
Staphylococcus aureus (VISA) ATCC 700699	1.09589e-09	Novobiocin, 4xMIC	Novobiocin	4
Staphylococcus aureus (VISA) ATCC 700699	8.74317e-10	Novobiocin, 4xMIC	Novobiocin	4
Staphylococcus aureus (VISA) ATCC 700699	1.17949e-09	Novobiocin, 4xMIC	Novobiocin	4
Staphylococcus aureus (VISA) ATCC 700699	3.45e-09	Novobiocin, 4xMIC	Novobiocin	4
Staphylococcus aureus (VISA) ATCC 700699	2.78e-09	Novobiocin, 4xMIC	Novobiocin	4
Staphylococcus aureus (VISA) ATCC 700699	2.82e-09	Novobiocin, 4xMIC	Novobiocin	4
Staphylococcus aureus (VISA) ATCC 700699	3.16e-09	Novobiocin, 4xMIC	Novobiocin	4
Staphylococcus aureus (VISA) ATCC 700699	3.94265e-10	Novobiocin, 8xMIC	Novobiocin	8
Staphylococcus aureus (VISA) ATCC 700699	2.3622e-10	Novobiocin, 8xMIC	Novobiocin	8
Staphylococcus aureus (VISA) ATCC 700699	2.27273e-10	Novobiocin, 8xMIC	Novobiocin	8
Staphylococcus aureus (VISA) ATCC 700699	1.82648e-10	Novobiocin, 8xMIC	Novobiocin	8
Staphylococcus aureus (VISA) ATCC 700699	2.73224e-10	Novobiocin, 8xMIC	Novobiocin	8
Staphylococcus aureus (VISA) ATCC 700699	2.05128e-10	Novobiocin, 8xMIC	Novobiocin	8
Staphylococcus aureus (VISA) ATCC 700699	3.58974e-10	Novobiocin, 8xMIC	Novobiocin	8
Staphylococcus aureus (VISA) ATCC 700699	1.45e-09	Novobiocin, 8xMIC	Novobiocin	8
Staphylococcus aureus (VISA) ATCC 700699	1.45e-09	Novobiocin, 8xMIC	Novobiocin	8
Staphylococcus aureus (VISA) ATCC 700699	1.45e-09	Novobiocin, 8xMIC	Novobiocin	8

## Sheet: Fig 3A.
Generation number		0	4	8	12	16	20	24	28	32	36	40	44	48	52	56	60	64	68	72	76
	Well position	MIC fold-change	MIC fold-change of max. cc plate, where cells grew	MIC fold-change	MIC fold-change	MIC fold-change	MIC fold-change	MIC fold-change	MIC fold-change	MIC fold-change	MIC fold-change	MIC fold-change	MIC fold-change	MIC fold-change	MIC fold-change	MIC fold-change	MIC fold-change	MIC fold-change	MIC fold-change	MIC fold-change	MIC fold-change
ULD1	A2	0.5	1.25	3.125	1.5625	0.78125	0.78125	0.78125	1.172	1.172	0.586	1.465	1.465	3.6625	1.83125	0.915625	1.37344	1.37344	3.43359	1.7168	0.858398
	B3	0.5	1.25	3.125	1.5625	0.78125	0.390625	0.976562	1.46484	1.46484	0.732422	0.732422	0.732422	1.09863	0.549316	0.274658	0.411987	0.205994	0.514984	1.28746	0.64373
	A4	0.5	1.25	1.875	0.9375	0.46875	0.234375	0.585938	1.75775	1.75775	0.878875	0.878875	2.19719	2.19719	1.09859	0.549297	1.37324	2.05986	2.05986	1.02993	0.514966
	B5	0.5	0.25	0.125	0.0625	0.03125	0.078125	0.195312	0.488281	0.488281	1.2207	1.83105	4.57764	11.4441	28.6102	71.5256	35.7628	89.407	134.11	201.166	502.914
	A6	0.5	1.25	3.125	4.6875	2.34375	2.34375	5.85938	5.85938	5.85938	5.85938	2.92969	7.32422	18.3105	9.15527	4.57764	11.4441	5.72205	14.3051	7.15256	3.57628
	B7	0.5	1.25	1.875	0.9375	0.9375	1.40625	2.10938	3.16406	3.16406	1.58203	0.791016	1.18652	2.96631	1.48315	0.741577	1.11237	1.11237	1.66855	2.50282	1.25141
	A8	0.5	1.25	3.125	3.125	1.5625	2.34375	5.85938	2.92969	2.92969	4.39453	2.19727	3.2959	8.23975	4.11987	4.11987	6.17981	6.17981	15.4495	7.72476	7.72476
	B9	0.5	1.25	1.25	3.125	1.5625	1.5625	3.90625	1.95312	1.95312	0.976562	2.44141	1.2207	3.05176	1.52588	0.762939	0.38147	0.38147	0.953674	2.38419	1.19209
	A10	0.5	1.25	3.125	3.125	7.8125	3.90625	1.95312	4.88281	4.88281	7.32422	7.32422	7.32422	18.3105	9.15527	4.57764	11.4441	5.72205	8.58307	8.58307	4.29153
	B11	0.5	0.75	1.125	2.8125	2.8125	2.8125	7.03125	3.51562	3.51562	8.78906	4.39453	10.9863	5.49316	2.74658	1.37329	2.05994	2.05994	5.14984	7.72476	3.86238
	Average	0.5	1.1	2.1875	2.19375	1.90938	1.58594	2.92578	2.71876	2.71876	3.23438	2.49855	4.03101	7.47745	6.02754	8.94181	7.15432	11.4224	18.6229	24.1272	52.683
ULD2	D3	0.25	0.625	1.5625	3.90625	5.85938	14.6484	7.32422	3.66211	3.66211	9.15527	22.8882	11.4441	5.72205	2.86102	1.43051	3.57628	1.78814	4.47035	6.70552	3.35276
	D5	0.25	0.625	1.5625	3.90625	5.85938	14.6484	36.6211	91.5527	91.5527	228.882	114.441	57.2205	28.6102	14.3051	35.7628	17.8814	17.8814	44.7035	67.0552	167.638
	D7	0.25	0.625	1.5625	3.90625	5.85938	8.78906	21.9727	32.959	32.959	49.4385	49.4385	49.4385	123.596	61.7981	154.495	386.238	193.119	96.5595	48.2798	120.699
	D9	0.25	0.625	0.9375	0.46875	0.234375	0.117188	0.0585938	0.0292969	0.0292969	0.0732422	0.183105	0.457764	1.14441	0.572205	0.286102	0.286102	0.143051	0.214577	0.321865	0.160933
	D11	0.25	0.625	1.5625	0.78125	0.78125	0.390625	0.976562	0.488281	0.488281	1.2207	0.610352	0.915527	2.28882	2.28882	1.14441	2.86102	1.43051	3.57628	5.36442	2.68221
	E2	0.25	0.625	1.5625	3.90625	1.95312	0.976562	2.44141	1.2207	1.2207	1.83105	0.915527	0.457764	0.228882	0.343323	0.171661	0.429153	0.214577	0.536442	0.268221	0.13411
	E4	0.25	0.625	1.5625	3.90625	3.90625	9.76562	24.4141	36.6211	36.6211	54.9316	54.9316	82.3975	41.1987	41.1987	102.997	102.997	51.4984	128.746	64.373	160.933
	E6	0.25	0.625	1.5625	1.5625	0.78125	0.78125	1.95312	2.92969	2.92969	1.46484	1.46484	1.46484	3.66211	3.66211	1.83105	2.74658	6.86646	6.86646	6.86646	3.43323
	E8	0.25	0.625	0.9375	2.34375	5.85938	5.85938	14.6484	7.32422	7.32422	18.3105	27.4658	13.7329	20.5994	20.5994	51.4984	51.4984	25.7492	64.373	32.1865	80.4663
	E10	0.25	0.625	1.5625	0.78125	0.78125	0.78125	1.95312	1.95312	1.95312	0.976562	2.44141	2.44141	3.66211	1.83105	0.915527	2.28882	2.28882	3.43323	3.43323	1.71661
	Average	0.25	0.625	1.4375	2.54688	3.1875	5.67578	11.2363	17.874	17.874	36.6284	27.478	21.9971	23.0713	14.946	35.0533	57.0803	30.098	35.3479	23.4854	54.1216
Novobiocin	G2	0.6	1.5	3.75	5.625	2.8125	7.03125	17.5781	43.9453	43.9453	21.9727	21.9727	10.9863	27.4658	68.6646	34.3323	85.8307	42.9153	21.4577	21.4577	10.7288
	H3	0.6	1.5	3.75	9.375	4.6875	11.7188	29.2969	29.2969	29.2969	29.2969	14.6484	7.32422	3.66211	1.83105	4.57764	11.4441	28.6102	14.3051	21.4577	53.6442
	G4	0.6	0.6	0.3	0.15	0.075	0.1875	0.46875	1.17188	1.17188	2.92969	7.32422	18.3105	45.7764	114.441	286.102	715.256	357.628	894.07	447.035	1117.59
	H5	0.6	0.6	0.3	0.15	0.075	0.1875	0.46875	1.17188	1.17188	2.92969	7.32422	18.3105	45.7764	114.441	57.2205	28.6102	14.3051	21.4577	32.1865	16.0933
	G6	0.6	1.5	3.75	5.625	5.625	2.8125	7.03125	7.03125	7.03125	3.51562	3.51562	1.75781	4.39453	10.9863	5.49316	2.74658	1.37329	3.43323	3.43323	1.71661
	H7	0.6	0.3	0.15	0.075	0.0375	0.09375	0.234375	0.585938	0.585938	1.46484	3.66211	9.15527	22.8882	57.2205	143.051	357.628	536.442	1341.1	1341.1	1341.1
	G8	0.6	1.5	3.75	9.375	23.4375	58.5938	146.484	366.211	366.211	366.211	183.105	457.764	1144.41	2861.02	2861.02	2861.02	2861.02	2861.02	2861.02	2861.02
	H9	0.6	1.5	0.75	0.375	0.1875	0.46875	1.17188	2.92969	2.92969	7.32422	18.3105	45.7764	114.441	286.102	715.256	1072.88	536.442	1341.1	1341.1	1341.1
	G10	0.6	1.5	0.75	0.375	0.1875	0.46875	1.17188	2.92969	2.92969	7.32422	18.3105	45.7764	114.441	286.102	715.256	357.628	178.814	447.035	223.517	558.794
	H11	0.6	1.5	2.25	5.625	14.0625	7.03125	3.51562	8.78906	8.78906	4.39453	4.39453	2.19727	3.2959	8.23975	4.11987	2.05994	1.02997	1.54495	0.772476	0.386238
	Average	0.6	1.2	1.95	3.675	5.11875	8.85938	20.7422	46.4062	46.4062	44.7363	28.2568	61.7358	152.655	380.905	482.643	549.511	455.858	694.654	629.309	730.218

## Sheet: Fig 3B.
Well	Strain	Doubling_time	Growth_rate	Lag_phase_length	OD_increment	AUC
B1	Wild type	0.569827	1.21642	2.81419	1.99473	1533.11
B2	Wild type	0.628306	1.1032	2.86385	2.14194	1551.57
B3	Wild type	0.569438	1.21725	2.71494	2.14663	1563.47
B4	Wild type	0.618764	1.12021	3.21911	2.17231	1570.5
B5	Wild type	0.616785	1.12381	3.61072	2.15501	1557.69
B6	Wild type	0.611178	1.13412	3.27723	2.18475	1577.27
B7	Evolved line 1	0.603688	1.14819	7.0233	0.0895627	142.248
B8	Evolved line 1	0.5426	1.27746	7.85725	0.0859203	141.35
B9	Evolved line 1	0.654899	1.0584	7.67722	0.0814739	127.86
B10	Evolved line 1	0.608968	1.13823	8.06995	0.0794544	126.355
B11	Evolved line 1	0.524411	1.32176	7.65658	0.0752165	119.714
B12	Evolved line 1	0.625604	1.10797	7.40371	0.0799401	131.419
C1	Evolved line 2	0.438789	1.57968	14.2847	0.0520885	52.9542
C2	Evolved line 2	0.502073	1.38057	16.0569	0.0606176	70.134
C3	Evolved line 2	0.655876	1.05683	16.1734	0.0599119	75.7672
C4	Evolved line 2	0.568445	1.21937	15.23	0.0616137	63.2768
C5	Evolved line 2	0.479916	1.44431	15.0867	0.0512756	56.7641
C6	Evolved line 2	0.58554	1.18377	15.3676	0.0621233	78.6556
C7	Evolved line 3	0.156493	4.42926	22.8038	0.148015	167.283
C8	Evolved line 3	0.574296	1.20695	16.5917	0.0146033	0
C9	Evolved line 3	0.313125	2.21364	19.9316	0.00868052	0
C10	Evolved line 3	0	0	0	0	0
C11	Evolved line 3	0	0	0	0	0
C12	Evolved line 3	0.359645	1.92731	41.4978	0.0272821	0
D1	Evolved line 4	0	0	0	0	0
D2	Evolved line 4	0	0	0	0	0
D3	Evolved line 4	0	0	0	0	0
D4	Evolved line 4	0	0	0	0	0
D5	Evolved line 4	0	0	0	0	0
D6	Evolved line 4	0	0	0	0	0
D7	Evolved line 5	0.296919	2.33447	7.08332	0.131532	160.726
D8	Evolved line 5	0.366019	1.89374	6.22941	0.154782	151.061
D9	Evolved line 5	0.395014	1.75474	7.61033	0.126552	132.786
D10	Evolved line 5	0.391038	1.77258	6.69035	0.142733	156.147
D11	Evolved line 5	0.423112	1.63821	6.75207	0.116681	122.313
D12	Evolved line 5	0.337264	2.05521	5.47963	0.119471	101.286
E1	Evolved line 6	0.507874	1.3648	13.9645	0.105067	156.96
E2	Evolved line 6	0.546244	1.26893	13.9741	0.108806	186.656
E3	Evolved line 6	0.563671	1.2297	12.8882	0.0958429	165.678
E4	Evolved line 6	0.582451	1.19005	14.1775	0.112935	193.142
E5	Evolved line 6	0.574485	1.20655	13.5089	0.110988	192.757
E6	Evolved line 6	0.55981	1.23818	13.5854	0.105995	177.88
E7	Evolved line 7	0.486105	1.42592	3.07333	1.25892	1078.15
E8	Evolved line 7	0.527937	1.31293	3.02778	1.21162	1062.02
E9	Evolved line 7	0.530024	1.30777	4.11758	1.21591	1082.43
E10	Evolved line 7	0.519195	1.33504	6.28808	1.23781	1090.84
E11	Evolved line 7	0.516002	1.3433	3.11203	1.31882	1123.92
E12	Evolved line 7	0.514195	1.34802	3.26218	1.27539	1124.96
F1	Evolved line 8	0.473312	1.46446	16.9153	0.0727077	79.7568
F2	Evolved line 8	0.643486	1.07717	15.4718	0.0509108	78.2893
F3	Evolved line 8	0.639006	1.08473	15.2908	0.0626073	96.9199
F4	Evolved line 8	0.613482	1.12986	15.4778	0.0540432	87.7957
F5	Evolved line 8	0.658203	1.05309	15.3065	0.0699764	112.946
F6	Evolved line 8	0.624727	1.10952	15.5521	0.0524751	85.2241
F7	Evolved line 9	1.05155	0.659169	4.39206	0.001	0
F8	Evolved line 9	0.893055	0.776153	4.91667	0.001	0
F9	Evolved line 9	0	0	0	0	0
F10	Evolved line 9	0	0	0	0	0
F11	Evolved line 9	0	0	0	0	0
F12	Evolved line 9	0	0	0	0	0
G1	Evolved line 10	0	0	0	0	0
G2	Evolved line 10	0	0	0	0	0
G3	Evolved line 10	0.879321	0.788275	1.00005	0.00188001	0
G4	Evolved line 10	0.717792	0.965666	2.11751	0.00200001	0
G5	Evolved line 10	0.893213	0.776016	21.8449	0.00140001	0
G6	Evolved line 10	0.768074	0.902448	2.92996	0.00180001	0

## Sheet: Fig 3D.
	ULD1 MIC (ug/ml)	ULD2 MIC (ug/ml)	ULD1 MIC fold-change	ULD2 MIC fold-change
Evolved 1	0.016	0.016	0.4	0.8
Evolved 2	0.125	0.016	3.13	0.8
Evolved 3	0.016	0.016	0.4	0.8
Evolved 4	0.25	0.063	6.25	3.15
Evolved 5	0.063	0.031	1.58	1.55
Evolved 6	0.063	0.016	1.58	0.8
Evolved 7	0.125	0.016	3.13	0.8
Evolved 8	0.125	0.016	3.13	0.8
Evolved 9	0.016	0.016	0.4	0.8
WT	0.04	0.02	1	1

## Sheet: Fig 4A.
Treatment	Log CFU/Skin	Antibiotic	Strain
Pretreatment	5.46	None	Staphylococcus aureus USA300 (MRSA)
Pretreatment	5.52	None	Staphylococcus aureus USA300 (MRSA)
Pretreatment	5.71	None	Staphylococcus aureus USA300 (MRSA)
Pretreatment	5	None	Staphylococcus aureus USA300 (MRSA)
Pretreatment	5.06	None	Staphylococcus aureus USA300 (MRSA)
No treatment control	6.49	None	Staphylococcus aureus USA300 (MRSA)
No treatment control	7.35	None	Staphylococcus aureus USA300 (MRSA)
No treatment control	7.15	None	Staphylococcus aureus USA300 (MRSA)
No treatment control	7.41	None	Staphylococcus aureus USA300 (MRSA)
No treatment control	7.34	None	Staphylococcus aureus USA300 (MRSA)
2% ULD-1	4.61	ULD-1	Staphylococcus aureus USA300 (MRSA)
2% ULD-1	3.68	ULD-1	Staphylococcus aureus USA300 (MRSA)
2% ULD-1	4.97	ULD-1	Staphylococcus aureus USA300 (MRSA)
2% ULD-1	3.75	ULD-1	Staphylococcus aureus USA300 (MRSA)
2% ULD-1	4.86	ULD-1	Staphylococcus aureus USA300 (MRSA)
2% ULD-2	4.14	ULD-2	Staphylococcus aureus USA300 (MRSA)
2% ULD-2	4.81	ULD-2	Staphylococcus aureus USA300 (MRSA)
2% ULD-2	5.33	ULD-2	Staphylococcus aureus USA300 (MRSA)
2% ULD-2	6.64	ULD-2	Staphylococcus aureus USA300 (MRSA)
2% ULD-2	5.97	ULD-2	Staphylococcus aureus USA300 (MRSA)
Pretreatment	4.98	None	Staphylococcus aureus Mu50 ATCC 700699 (VISA)
Pretreatment	5.78	None	Staphylococcus aureus Mu50 ATCC 700699 (VISA)
Pretreatment	4.98	None	Staphylococcus aureus Mu50 ATCC 700699 (VISA)
Pretreatment	5.53	None	Staphylococcus aureus Mu50 ATCC 700699 (VISA)
Pretreatment	5.26	None	Staphylococcus aureus Mu50 ATCC 700699 (VISA)
No treatment control	6.86	None	Staphylococcus aureus Mu50 ATCC 700699 (VISA)
No treatment control	6.31	None	Staphylococcus aureus Mu50 ATCC 700699 (VISA)
No treatment control	7.4	None	Staphylococcus aureus Mu50 ATCC 700699 (VISA)
No treatment control	6.26	None	Staphylococcus aureus Mu50 ATCC 700699 (VISA)
No treatment control	6.2	None	Staphylococcus aureus Mu50 ATCC 700699 (VISA)
2% ULD-1	5	ULD-1	Staphylococcus aureus Mu50 ATCC 700699 (VISA)
2% ULD-1	5.57	ULD-1	Staphylococcus aureus Mu50 ATCC 700699 (VISA)
2% ULD-1	5.65	ULD-1	Staphylococcus aureus Mu50 ATCC 700699 (VISA)
2% ULD-1	4.91	ULD-1	Staphylococcus aureus Mu50 ATCC 700699 (VISA)
2% ULD-1	5.98	ULD-1	Staphylococcus aureus Mu50 ATCC 700699 (VISA)
2% ULD-2	4.76	ULD-2	Staphylococcus aureus Mu50 ATCC 700699 (VISA)
2% ULD-2	5.44	ULD-2	Staphylococcus aureus Mu50 ATCC 700699 (VISA)
2% ULD-2	5.93	ULD-2	Staphylococcus aureus Mu50 ATCC 700699 (VISA)
2% ULD-2	4.96	ULD-2	Staphylococcus aureus Mu50 ATCC 700699 (VISA)
2% ULD-2	5.73	ULD-2	Staphylococcus aureus Mu50 ATCC 700699 (VISA)
Pretreatment	5.46	None	Staphylococcus aureus ECL 2963646 (VRSA)
Pretreatment	5.52	None	Staphylococcus aureus ECL 2963646 (VRSA)
Pretreatment	5.71	None	Staphylococcus aureus ECL 2963646 (VRSA)
Pretreatment	5	None	Staphylococcus aureus ECL 2963646 (VRSA)
Pretreatment	5.06	None	Staphylococcus aureus ECL 2963646 (VRSA)
No treatment control	6.83	None	Staphylococcus aureus ECL 2963646 (VRSA)
No treatment control	7.16	None	Staphylococcus aureus ECL 2963646 (VRSA)
No treatment control	6.97	None	Staphylococcus aureus ECL 2963646 (VRSA)
No treatment control	6.72	None	Staphylococcus aureus ECL 2963646 (VRSA)
No treatment control	6.94	None	Staphylococcus aureus ECL 2963646 (VRSA)
2% ULD-1	5.77	ULD-1	Staphylococcus aureus ECL 2963646 (VRSA)
2% ULD-1	5.81	ULD-1	Staphylococcus aureus ECL 2963646 (VRSA)
2% ULD-1	5.92	ULD-1	Staphylococcus aureus ECL 2963646 (VRSA)
2% ULD-1	6.59	ULD-1	Staphylococcus aureus ECL 2963646 (VRSA)
2% ULD-1	5.61	ULD-1	Staphylococcus aureus ECL 2963646 (VRSA)
2% ULD-2	5.96	ULD-2	Staphylococcus aureus ECL 2963646 (VRSA)
2% ULD-2	5.93	ULD-2	Staphylococcus aureus ECL 2963646 (VRSA)
2% ULD-2	5.51	ULD-2	Staphylococcus aureus ECL 2963646 (VRSA)
2% ULD-2	5.91	ULD-2	Staphylococcus aureus ECL 2963646 (VRSA)
2% ULD-2	5.45	ULD-2	Staphylococcus aureus ECL 2963646 (VRSA)

## Sheet: Fig 4B.
Treatment	Log CFU/Skin	Antibiotic	Strain
Pretreatment	5.46	None	Staphylococcus aureus USA300 (MRSA) Control
Pretreatment	5.52	None	Staphylococcus aureus USA300 (MRSA) Control
Pretreatment	5.71	None	Staphylococcus aureus USA300 (MRSA) Control
Pretreatment	5	None	Staphylococcus aureus USA300 (MRSA) Control
Pretreatment	5.06	None	Staphylococcus aureus USA300 (MRSA) Control
No treatment control	6.49	None	Staphylococcus aureus USA300 (MRSA) Control
No treatment control	7.35	None	Staphylococcus aureus USA300 (MRSA) Control
No treatment control	7.15	None	Staphylococcus aureus USA300 (MRSA) Control
No treatment control	7.41	None	Staphylococcus aureus USA300 (MRSA) Control
No treatment control	7.34	None	Staphylococcus aureus USA300 (MRSA) Control
2% Fusidic acid	4.49	Control	Staphylococcus aureus USA300 (MRSA) Control
2% Fusidic acid	5.07	Control	Staphylococcus aureus USA300 (MRSA) Control
2% Fusidic acid	4.98	Control	Staphylococcus aureus USA300 (MRSA) Control
2% Fusidic acid	4.68	Control	Staphylococcus aureus USA300 (MRSA) Control
2% Fusidic acid	3.36	Control	Staphylococcus aureus USA300 (MRSA) Control
Pretreatment	4.98	None	Staphylococcus aureus Mu50 ATCC 700699 (VISA) Control
Pretreatment	5.78	None	Staphylococcus aureus Mu50 ATCC 700699 (VISA) Control
Pretreatment	4.98	None	Staphylococcus aureus Mu50 ATCC 700699 (VISA) Control
Pretreatment	5.53	None	Staphylococcus aureus Mu50 ATCC 700699 (VISA) Control
Pretreatment	5.26	None	Staphylococcus aureus Mu50 ATCC 700699 (VISA) Control
No treatment control	6.86	None	Staphylococcus aureus Mu50 ATCC 700699 (VISA) Control
No treatment control	6.31	None	Staphylococcus aureus Mu50 ATCC 700699 (VISA) Control
No treatment control	7.4	None	Staphylococcus aureus Mu50 ATCC 700699 (VISA) Control
No treatment control	6.26	None	Staphylococcus aureus Mu50 ATCC 700699 (VISA) Control
No treatment control	6.2	None	Staphylococcus aureus Mu50 ATCC 700699 (VISA) Control
2% Mupirocin	3.89	Control	Staphylococcus aureus Mu50 ATCC 700699 (VISA) Control
2% Mupirocin	4.45	Control	Staphylococcus aureus Mu50 ATCC 700699 (VISA) Control
2% Mupirocin	5.25	Control	Staphylococcus aureus Mu50 ATCC 700699 (VISA) Control
2% Mupirocin	3.85	Control	Staphylococcus aureus Mu50 ATCC 700699 (VISA) Control
2% Mupirocin	4.43	Control	Staphylococcus aureus Mu50 ATCC 700699 (VISA) Control
Pretreatment	5.46	None	Staphylococcus aureus ECL 2963646 (VRSA) Control
Pretreatment	5.52	None	Staphylococcus aureus ECL 2963646 (VRSA) Control
Pretreatment	5.71	None	Staphylococcus aureus ECL 2963646 (VRSA) Control
Pretreatment	5	None	Staphylococcus aureus ECL 2963646 (VRSA) Control
Pretreatment	5.06	None	Staphylococcus aureus ECL 2963646 (VRSA) Control
No treatment control	6.83	None	Staphylococcus aureus ECL 2963646 (VRSA) Control
No treatment control	7.16	None	Staphylococcus aureus ECL 2963646 (VRSA) Control
No treatment control	6.97	None	Staphylococcus aureus ECL 2963646 (VRSA) Control
No treatment control	6.72	None	Staphylococcus aureus ECL 2963646 (VRSA) Control
No treatment control	6.94	None	Staphylococcus aureus ECL 2963646 (VRSA) Control
2% Mupirocin	5.07	Control	Staphylococcus aureus ECL 2963646 (VRSA) Control
2% Mupirocin	5.72	Control	Staphylococcus aureus ECL 2963646 (VRSA) Control
2% Mupirocin	5.58	Control	Staphylococcus aureus ECL 2963646 (VRSA) Control
2% Mupirocin	5.64	Control	Staphylococcus aureus ECL 2963646 (VRSA) Control
2% Mupirocin	4.16	Control	Staphylococcus aureus ECL 2963646 (VRSA) Control

## Sheet: Fig 4C.
Treatment	Log CFU/g thigh	Antibiotic	Strain
Pretreatment	6.5	None	Staphylococcus aureus Mu50 ATCC 700699 (VISA)
Pretreatment	6.38	None	Staphylococcus aureus Mu50 ATCC 700699 (VISA)
Pretreatment	6.46	None	Staphylococcus aureus Mu50 ATCC 700699 (VISA)
Pretreatment	6.63	None	Staphylococcus aureus Mu50 ATCC 700699 (VISA)
No treatment control	8.82	None	Staphylococcus aureus Mu50 ATCC 700699 (VISA)
No treatment control	8.68	None	Staphylococcus aureus Mu50 ATCC 700699 (VISA)
No treatment control	8.96	None	Staphylococcus aureus Mu50 ATCC 700699 (VISA)
No treatment control	8.92	None	Staphylococcus aureus Mu50 ATCC 700699 (VISA)
No treatment control	9.11	None	Staphylococcus aureus Mu50 ATCC 700699 (VISA)
ULD1, 10 mg/kg	7.54	ULD1	Staphylococcus aureus Mu50 ATCC 700699 (VISA)
ULD1, 10 mg/kg	7.91	ULD1	Staphylococcus aureus Mu50 ATCC 700699 (VISA)
ULD1, 10 mg/kg	8.09	ULD1	Staphylococcus aureus Mu50 ATCC 700699 (VISA)
ULD1, 10 mg/kg	8.46	ULD1	Staphylococcus aureus Mu50 ATCC 700699 (VISA)
ULD1, 25 mg/kg	6.73	ULD1	Staphylococcus aureus Mu50 ATCC 700699 (VISA)
ULD1, 25 mg/kg	6.88	ULD1	Staphylococcus aureus Mu50 ATCC 700699 (VISA)
ULD1, 25 mg/kg	7.28	ULD1	Staphylococcus aureus Mu50 ATCC 700699 (VISA)
ULD1, 25 mg/kg	6.95	ULD1	Staphylococcus aureus Mu50 ATCC 700699 (VISA)
ULD1, 50 mg/kg	5.41	ULD1	Staphylococcus aureus Mu50 ATCC 700699 (VISA)
ULD1, 50 mg/kg	5.69	ULD1	Staphylococcus aureus Mu50 ATCC 700699 (VISA)
Pretreatment	6.5	None	Staphylococcus aureus Mu50 ATCC 700699 (VISA) Control
Pretreatment	6.38	None	Staphylococcus aureus Mu50 ATCC 700699 (VISA) Control
Pretreatment	6.46	None	Staphylococcus aureus Mu50 ATCC 700699 (VISA) Control
Pretreatment	6.63	None	Staphylococcus aureus Mu50 ATCC 700699 (VISA) Control
No treatment control	8.82	None	Staphylococcus aureus Mu50 ATCC 700699 (VISA) Control
No treatment control	8.68	None	Staphylococcus aureus Mu50 ATCC 700699 (VISA) Control
No treatment control	8.96	None	Staphylococcus aureus Mu50 ATCC 700699 (VISA) Control
No treatment control	8.92	None	Staphylococcus aureus Mu50 ATCC 700699 (VISA) Control
No treatment control	9.11	None	Staphylococcus aureus Mu50 ATCC 700699 (VISA) Control
Linezolid, 50 mg/kg	5.65	Linezolid	Staphylococcus aureus Mu50 ATCC 700699 (VISA) Control
Linezolid, 50 mg/kg	6.12	Linezolid	Staphylococcus aureus Mu50 ATCC 700699 (VISA) Control
Linezolid, 50 mg/kg	4.95	Linezolid	Staphylococcus aureus Mu50 ATCC 700699 (VISA) Control

## Sheet: S2 Fig.
Time (hour)	ULD1 10xMIC	ULD2 10xMIC	Novobiocin 10xMIC	Fusidic acid 10xMIC	Vancomycin 10xMIC	+ctrl, no Ab
0	280000	280000	280000	280000	280000	280000
3	98000	99000	99000	78000	84000	570000
6	63000	56000	47000	56000	33000	8100000
12	4900	7000	5800	14000	1300	3000000000
18	1700	490	1500	3400	3800	1800000000
24	850	190	800	1400	160	150000000000
48	160	17	640	17000	53	15000000000
Colony numbers
Sample 1
Time (h)	Dilution	ULD1	ULD2	Novobiocin	Fusidic acid	Vancomycin	+ ctrl
0	100	145	145	145	145	145	145
3	100	54	56	63	47	48	50
6	100	38	28	21	31	20	30
12	10	20	48	33	81	8	179
18	1	83	31	81	223	231	97
24	0.5	65	11	56	163	17	700
48	0.5	23	1	16	15	15	78
Sample 2
Time (h)	Dilution	ULD1	ULD2	Novobiocin	Fusidic acid	Vancomycin	+ ctrl
0	100	132	132	132	132	132	132
3	100	53	39	38	39	36	13
6	100	20	24	29	21	13	35
12	10	23	20	23	58	7	66
18	1	63	22	65	160	176	78
24	0.5	80	6	43	86	12	500
48	0.5	14	2	48	5000	1	69
	0.25
Sample 3
Time (h)	Dilution	ULD1	ULD2	Novobiocin	Fusidic acid	Vancomycin	+ ctrl
0	100	137	137	137	137	137	137
3	100	40	53	48	31	42	23
6	100	36	32	21	32	16	57
12	10	31	37	31	73	4	208
18	1	113	20	84	130	163	92
24	0.5	110	40	140	158	18	1000
48	0.5	11	2	127	6	1	78
	0.25

## Sheet: S3 Fig.
	ULD1 MIC (ug/ml)	ULD2 MIC (ug/ml)	Novobiocin MIC (ug/ml)
VISA GyrB R144I	0.198	0.058	8
VISA GyrB R144G	0.132	0.058	4
VISA GyrB I175T	0.198	0.088	0.032
VISA wt	0.04	0.02	0.05

[truncated: 2 more sheets: S4A and S4B. Fig., S5A Fig.]
