# Supplementary material for: Rational design of balanced dual-targeting antibiotics with limited resistance
Source: PLoS Biol. 2020 Oct 5;18(10):e3000819. doi: 10.1371/journal.pbio.3000819 (PMC7561186; doi:10.1371/journal.pbio.3000819)
Supplement: S2 Table — Table shows the position of first-step ULD1 resistance-conferring mutations within the drug’s binding pocket in GyrB and ParE at amino acid positions that are interacting with ULD1 (based on Induced Fit Docking and subsequent molecular dynamics simulation). Mutations have not been detected at interacting amino acids Asp81, Arg84, and Pro87 (in bold), in accordance with a prior study that has revealed that these residues are difficult to mutate as they have essential role in enzymatic function [39]. GyrB, subunit B of DNA gyrase; ParE, subunit E of topoisomerase IV. (XLSX) [file pbio.3000819.s002.xlsx]

## Sheet: Munka1
Target protein	Mutated amino acid positions interacting with ULD1	Non-mutated amino acid positions interacting with ULD1
GyrB	Gly85, Arg144, Thr173, Ile175	Ile51, Val79, Asp81, Arg84, Ile86, Pro87, Ile102, Leu103
ParE	Phe95, Ala120, Arg136, Thr166	Ile44, Ile72, Asp74, Arg77, Gly78, Met79, Pro80, Ile94, Val168
