# Supplementary material for: Rational design of balanced dual-targeting antibiotics with limited resistance
Source: PLoS Biol. 2020 Oct 5;18(10):e3000819. doi: 10.1371/journal.pbio.3000819 (PMC7561186; doi:10.1371/journal.pbio.3000819)
Supplement: S3 Table — MIC measurements were performed in 3 replicates according to CLSI guidelines. -R, resistant; -NS, nonsensitive; CLSI, Clinical and Laboratory Standards Institute; GISA, glycopeptide-intermediate S. aureus; MIC, minimum inhibitory concentration; MSSA/VSSA, methicillin-sensitive/vancomycin-sensitive S. aureus; MRSA/VRSA, methicillin-resistant/vancomycin-resistant S. aureus; MRSE, methicillin-resistant S. epidermidis; VISA, vancomycin-intermediate S. aureus; VRE, vancomycin-resistant Enterococcus. (XLSX) [file pbio.3000819.s003.xlsx]

## Sheet: Munka1
Species and strain	Acquired resistance	ULD1	ULD2
		MIC (g/mL)
Staphylococcus aureus ATCC 29213		1	0.5
Staphylococcus aureus ATCC 33594	MSSA, VSSA, Gentamycin-R, Clindamycin-R, Erythromycin-R	0.5	0.125
Staphylococcus aureus ATCC 43300	MRSA (SCCmec type II) VSSA, Oxacillin-R	0.125	0.0625
Staphylococcus aureus ATCC 700699 (Mu50, NRS1)	MRSA (SCCmec type II), VISA, Clindamycin-R, Daptomycin-NS, Erythromycin-R, Gentamycin-R, Imipenem-R, Levofloxacin-R, Oxacillin-R	0.0625	≤0.03125
Staphylococcus aureus USA400, BAA-1707, NRS123	MRSA (SCCmec type IV), VSSA, Oxacillin-R	0.5	0.125
Staphylococcus aureus NRS271	MRSA (SCCmec type IV), Linezolid-R, Oxacillin-R, Imipenem-R, Levofloxacin-R, Cephalosporin-R, Tedizolid-R, Penicillin-R, Erythromycin-IR	1	0.25
Staphylococcus aureus ECL 2963646	MRSA, VRSA, Clindamycin-R, Erythromycin-R, Gentamycin-R, Levofloxacin-R	0.125	≤0.03125
Staphylococcus aureus CDC AR-BANK 0218	MRSA, VISA, Oxacillin-R, Mupirocin-R, Levofloxacin-R, Clindamycin-R, Daptomycin-NS, Erythromycin-R, Cephalosporin-R, Cefoxitin-R, Penicillin-R	1	0.125
Staphylococcus aureus	MRSA (SCCmec type IV), Oxacillin-R, VSSA, Cephalosporin-R, Erythromycin-R	1	0.063
Staphylococcus aureus USA300, ATCC BAA-1717	MRSA (SCCmec type IV), Oxacillin-R, VSSA, Cephalosporin-R, Clindamycin-R, Erythromycin-R, Levofloxacin-R, Mupirocin-R	0.5	0.063
Staphylococcus epidermidis ATCC 51625	MRSE, Oxacillin-R	0.0625	≤0.03125
Enterococcus faecalis ATCC 29212		0.125	≤0.03125
Enterococcus faecalis ATCC 51575	VRE (VanB+), Clindamycin-R, Erythromycin-R, Gentamycin-R, Linezolid-IR, Mupirocin-R, Streptomycin-R	0.0625	≤0.03125
Enterococcus faecium ATCC 19434		2	0.5
Enterococcus faecium ATCC 700221	VRE (VanA+), Ampicillin-R, Ciprofloxacin-R, Clindamycin-R, Colistin-R, Erythromycin-R, Gentamycin-R, Levofloxacin-R, Imipenem-R, Teicoplanin-R	0.0625	0.0625
Enterococcus faecium BAA-2320	VRE (VanA+), Ampicillin-R, Ciprofloxacin-R, Clindamycin-R, Erythromycin-R, Levofloxacin-R, Imipenem-R, Teicoplanin-R	0.25	≤0.03125
Enterococcus faecium CCUG 56858	VRE (VanB+), Ampicillin-R, Ciprofloxacin-R, Clindamycin-R, Erythromycin-R, Gentamycin-R, Levofloxacin-R, Imipenem-R	2	0.25
Streptococcus pneumoniae ATCC 49619		0.25	0.25
Streptococcus pneumoniae ATCC 51916	Cephalosporin-R, Erythromycin-R, Gentamycin-R, Imipenem-R, Penicillin-R	0.5	0.25
Streptococcus pneumoniae ATCC 700673	Clindamycin-R, Erythromycin-R, Gentamycin-R, Penicillin-R	0.5	0.25
Streptococcus pyogenes ATCC 14289		0.25	0.25
Streptococcus pyogenes ATCC 19615		0.125	0.125
Neisseria gonorrhoeae ATCC 700825		≤0.03125	≤0.03125
Neisseria gonorrhoeae CCUG 57598	Cefoxitin-R, Ciprofloxacin-R, Linezolid-R, Tetracycline-R, Penicillin-R	≤0.03125	≤0.03125
Haemophilus influenzae ATCC 49247	Ampicillin-R, Vancomycin-R, Tetracycline-R	≤0.03125	0.125
Haemophilus influenzae ATCC 35056	Ampicillin-R, Vancomycin-R	0.125	1
Helicobacter pylori ATCC 43504		4	4
Clostridium difficile BAA-1875	toxigenic, ribotype 078, Ertapenem-IR, Imipenem-R	≤0.03125	≤0.03125
Listeria monocytogenes ATCC 19111		0.125	0.125
Acinetobacter baumannii ATCC 17978		4	2
Acinetobacter baumannii ATCC 19606		2	0.5
Pseudomonas aeruginosa ATCC 27853		8	2
Pseudomonas aeruginosa B3-1811	Ciprofloxacin-R, Cephalosporin-R	>64	16
Klebsiella pneumoniae ATCC 10031		1	4
Escherichia coli ATCC 25922		4	16
Shigella flexneri 668		16	16
Shigella flexneri HNCMB 20018		8	8
