# Supplementary material for: Rational design of balanced dual-targeting antibiotics with limited resistance
Source: PLoS Biol. 2020 Oct 5;18(10):e3000819. doi: 10.1371/journal.pbio.3000819 (PMC7561186; doi:10.1371/journal.pbio.3000819)
Supplement: S9 Table — Compounds were assayed after 4 hours’ treatment with ULD1 or ULD2 on CHO-K1 cells, using a standard protocol [59]. A negative test (-) result indicates P > 0.05 by t-test and percentage of micronucleated cells less than 2-fold higher than the background level. (XLSX) [file pbio.3000819.s009.xlsx]

## Sheet: Munka1
Assay	Compound	Test Concentration (M)	Number of assayed cells	% Micronucleated cells	Test Result
Micronucleus test (CHO-K1 cells)		3.1 x 10-5	2141	0.47	-
		6.2 x 10-5	2282	0.36	-
	ULD1	1.3 x 10-4	2186	0.32	-
		2.5 x 10-4	2133	0.56	-
		5.0 x 10-4	2101	0.57	-
		3.1 x 10-5	2143	0.57	-
		6.2 x 10-5	2024	0.49	-
	ULD2	1.3 x 10-4	2146	1.07	-
		2.5 x 10-4	2051	1.36	-
		5.0 x 10-4	1408	0.78	-
